# Supplementary material for: The SMAC Mimetic APG-1387 Sensitizes Immune-Mediated Cell Apoptosis in Hepatocellular Carcinoma
Source: PubMed Central journal article supplement (PMC6232623; doi:10.3389/fphar.2018.01298), 2018-11-06
Supplement: Data_Sheet_1.pdf [file Data_Sheet_1.pdf]

*Supplementary Material*

**SMAC mimetic APG-1387 targets the inhibitor of apoptosis proteins and sensitizes immune-mediated cell apoptosis in hepatocellular carcinoma**

Zide Chen<sup>1</sup>, Jiehua Chen<sup>1</sup>, Hongyan Liu<sup>1</sup>, Wei Dong<sup>2</sup>, Xuan Huang<sup>1</sup>, Dajun Yang<sup>3</sup>, Jinlin Hou<sup>1</sup>, Xiaoyong Zhang<sup>1,\*</sup>

\* **Correspondence:** Xiaoyong Zhang: xiaoyzhang@smu.edu.cn

**Supplementary Figures and Tables**

**1 Supplementary Figures**

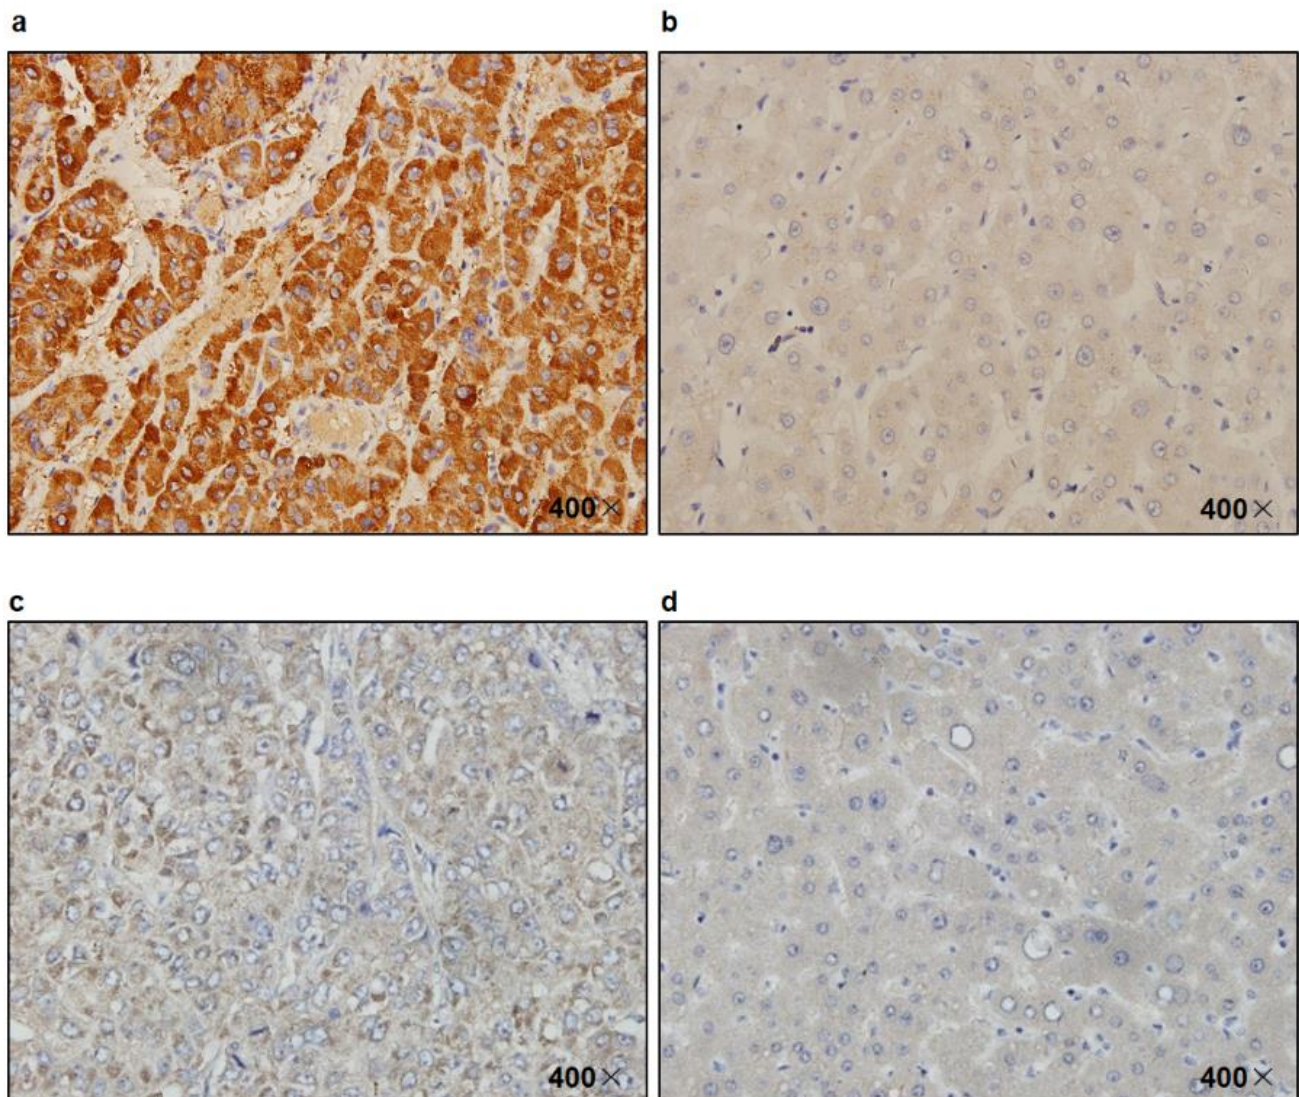

**Supplementary Figure 1.** The localization of cIAP1 and cIAP2 proteins in HCC tumor tissue. Immunohistochemical analysis of paraffin-embedded HCC (**a, c**) and adjacent normal liver tissue (**b, d**) showed that cIAP1 (**a, b**) and cIAP2 (**c, d**) were mainly located in the cytoplasm of hepatoma cells and normal hepatocytes. 400 × , 400 × magnification.

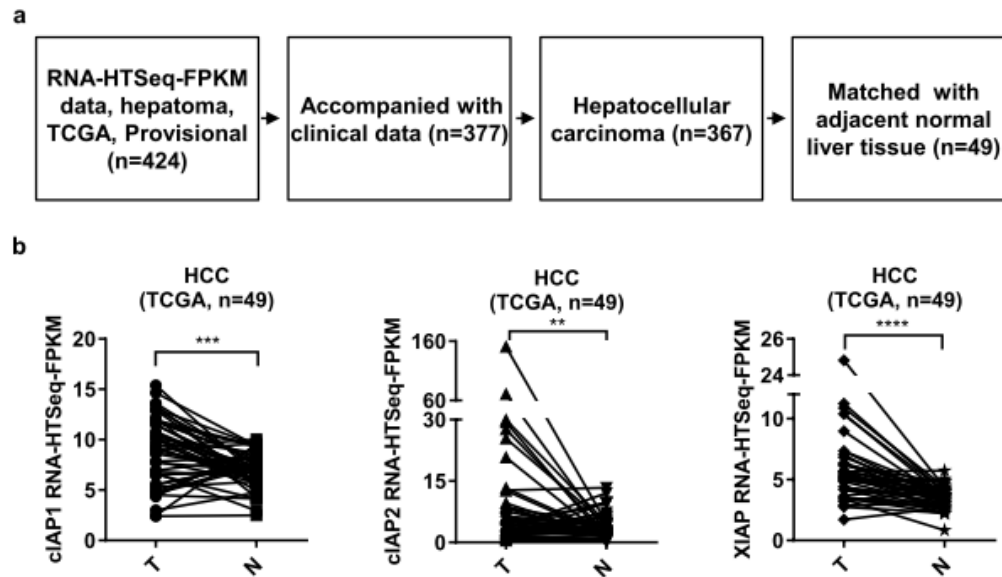

**Supplementary Figure 2.** Inhibitor of apoptosis protein (*IAP*) genes were highly expressed in HCC tissue. (a) Screening strategy of HCC patients from the cancer genome atlas (TCGA) database (updated until Jun 02, 2016; <http://tcga-data.nci.nih.gov/>). (b) The expressions of *cIAP1*, *cIAP2*, and *XIAP* mRNA in tumor and normal adjacent liver tissue from 49 HCCs were compared. RNA-HTSeq-FPKM, RNA-high throughput sequencing-fragments per kilobase of exon per million mapped reads; T, HCC tumor tissue; N, normal adjacent liver tissue. \*\*  $p < 0.01$ , \*\*\*  $p < 0.001$ , \*\*\*\*  $p < 0.0001$ , by two-tailed pair t-test.

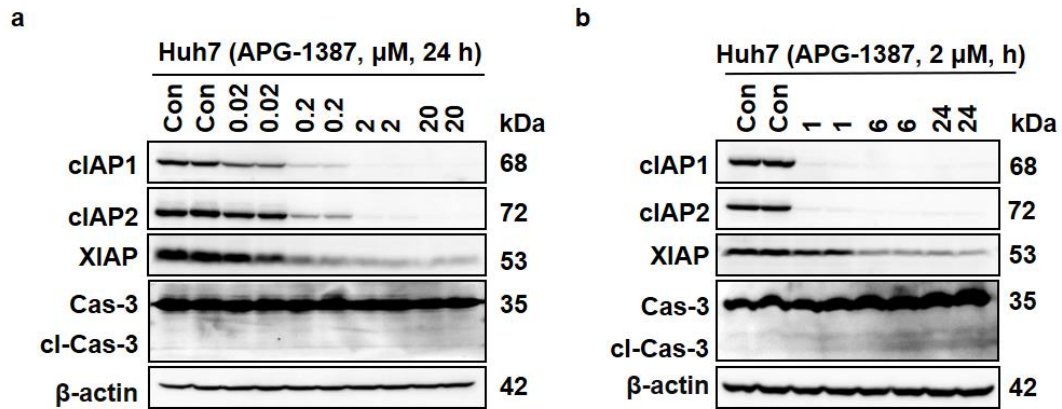

**Supplementary Figure 3.** The influence of APG-1387 on IAPs and caspase-3 in HCC cell line, Huh7, as a single drug. **(a, b)** Huh7 cells were seeded at  $1.5 \times 10^6$  cells per well in 6-well plates for 12 hours. After 24 hours of stimulation with 0, 0.02, 0.2, 2, 20  $\mu\text{M}$  APG-1387 respectively, or 0, 1, 6, 24 hours stimulation of 2  $\mu\text{M}$  APG-1387, lysates of Huh7 cells were collected and analyzed by Western blot to show the changes in cIAP1, cIAP2, XIAP and caspase-3 protein levels. Con, control; Cas-3, caspase-3; kDa, kilodalton.

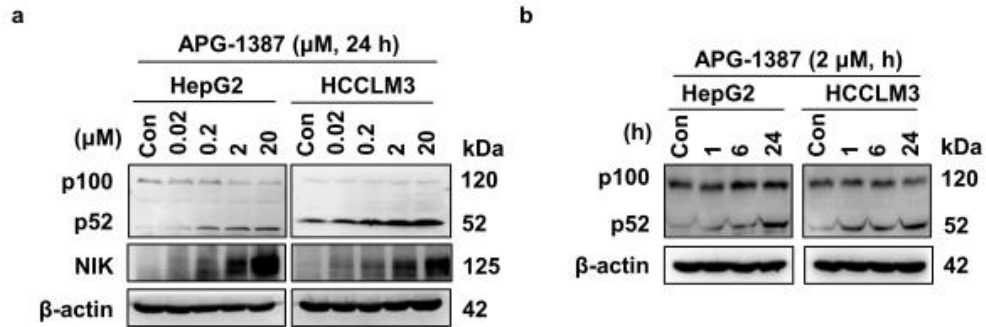

**Supplementary Figure 4.** APG-1387 activated non-classical NF- $\kappa$ B signaling of HCC cell lines. HepG2 and HCCLM3 cells were seeded at  $1.5 \times 10^6$  cells per well in 6-well plates for 12 hours. (**a**, **b**) After stimulating with different concentrations of APG-1387 for specified times, lysates of HepG2 and HCCLM3 cells were collected. The protein levels of p100, p52 and NF- $\kappa$ B inducing kinase (NIK) were analyzed by Western blot. Con, control; kDa, kilodalton.

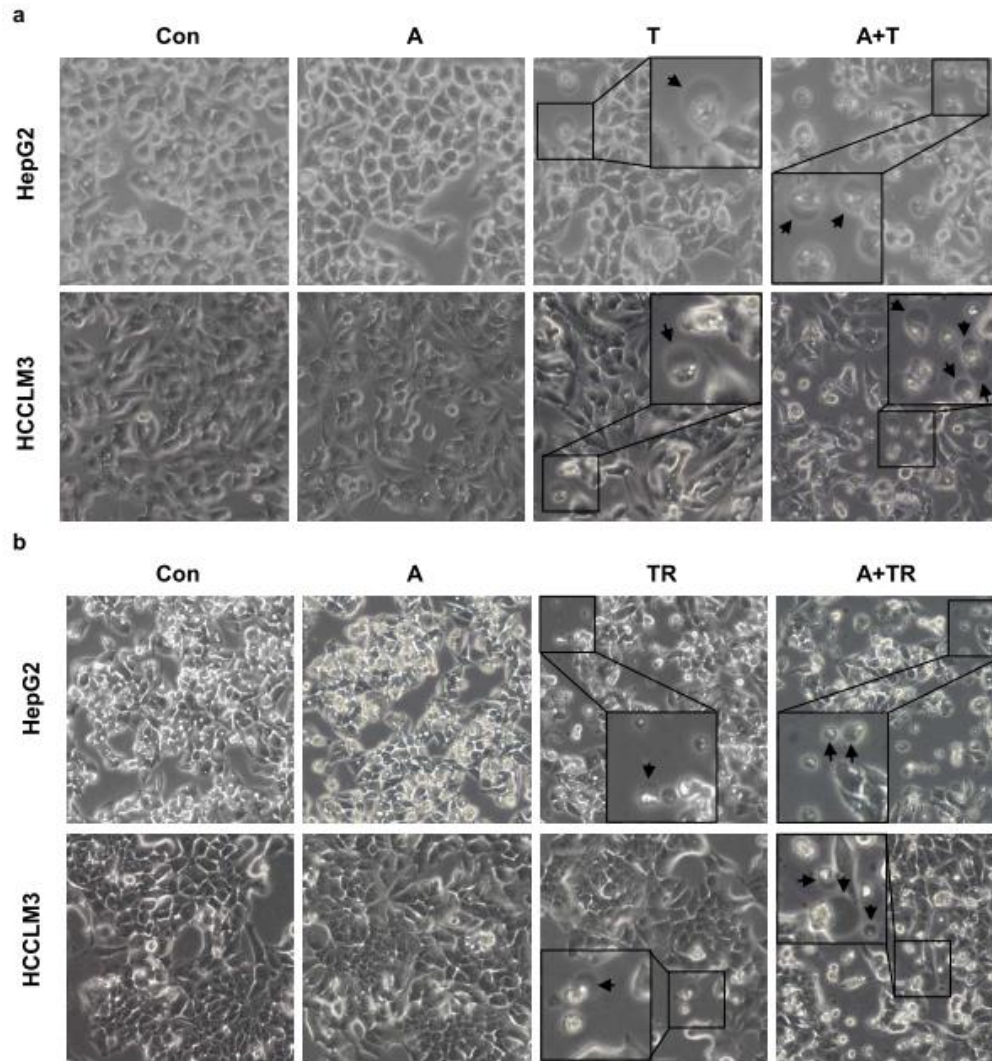

**Supplementary Figure 5.** The morphology changes of HCC cells, HepG2 and HCCLM3, after stimulation with APG-1387 and TNF- $\alpha$  or TRAIL. **(a)** HepG2 and **(b)** HCCLM3 cells were seeded at  $1 \times 10^6$  cells per well in 6-well plates for 12 hours. After 24 hours of stimulation with APG-1387 and TNF- $\alpha$  or TRAIL, the morphologic alterations of HepG2 or HCCLM3 were captured under inverted optical microscope (magnification, 100 $\times$ ). The arrows in the enlarged part (magnification, 400 $\times$ ) of the picture showed the images of cell necrosis. Con, control; A, 2  $\mu$ M APG-1387; T, 100 ng/ml TNF $\alpha$ ; TR, 20 ng/ml TRAIL.



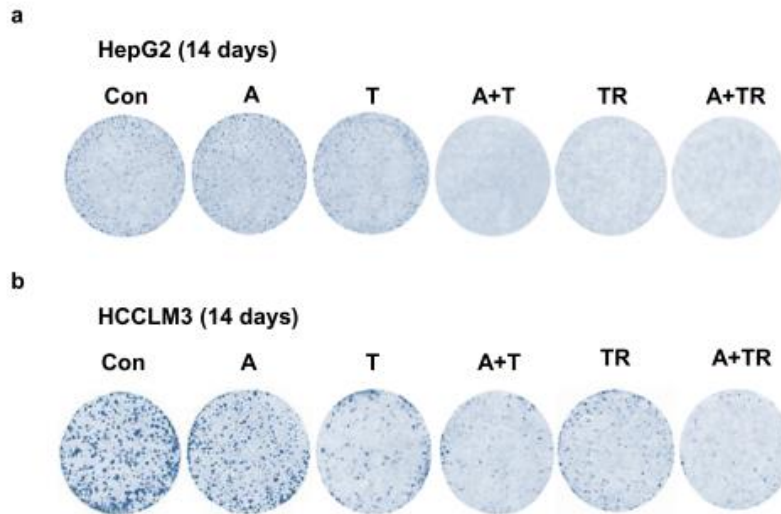

**Supplementary Figure 6.** APG-1387 treatment enhanced the inhibitory effect of TNF- $\alpha$  or TRAIL on the proliferation of HCC cells. **(a)** HepG2 and **(b)** HCCLM3 cells were pre-seeded in 6-well plates at 1,000 cells per well for 12 hours and then stimulated with 2  $\mu$ M APG-1387, 100 ng/ml TNF- $\alpha$ , 20 ng/ml TRAIL or their combination. After incubating for 14 days, the colonies were stained with Giemsa dye and counted with Image J software.

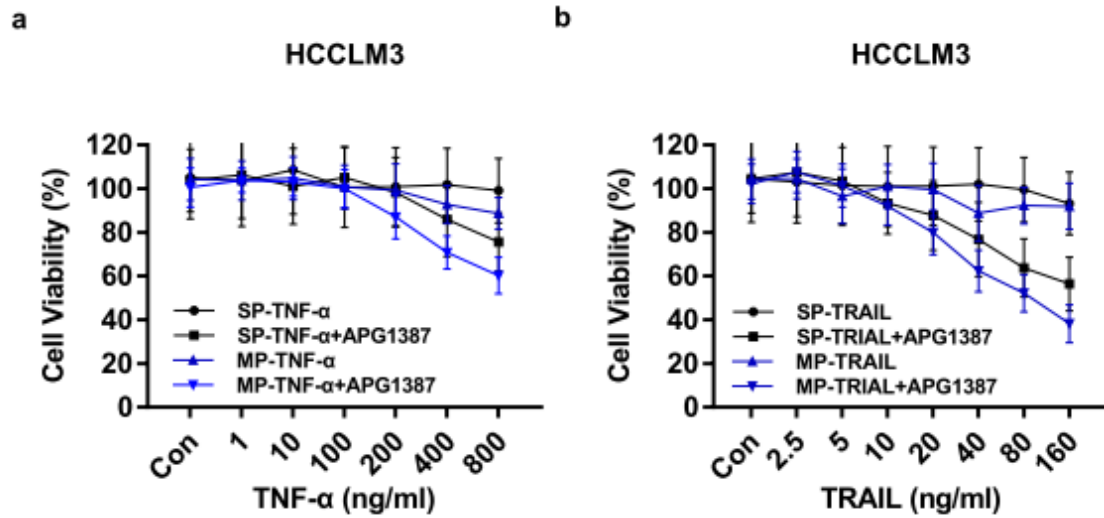

**Supplementary Figure 7.** The susceptibility of side population (SP) and major population (MP) cells in HCCLM3 cell line to the combination of APG-1387 and TNF- $\alpha$ /TRAIL. SP and MP cells were sorted from HCCLM3 cell line by flow cytometry and pre-inoculated in triplicate at 2,000 cells per well in 96-well plates for 12 hours. Cell viabilities were evaluated using a CCK-8 assay after 24 hours' stimulation with TNF- $\alpha$  (**a**) or TRAIL (**b**), or in combination with APG-1387. Con, control.



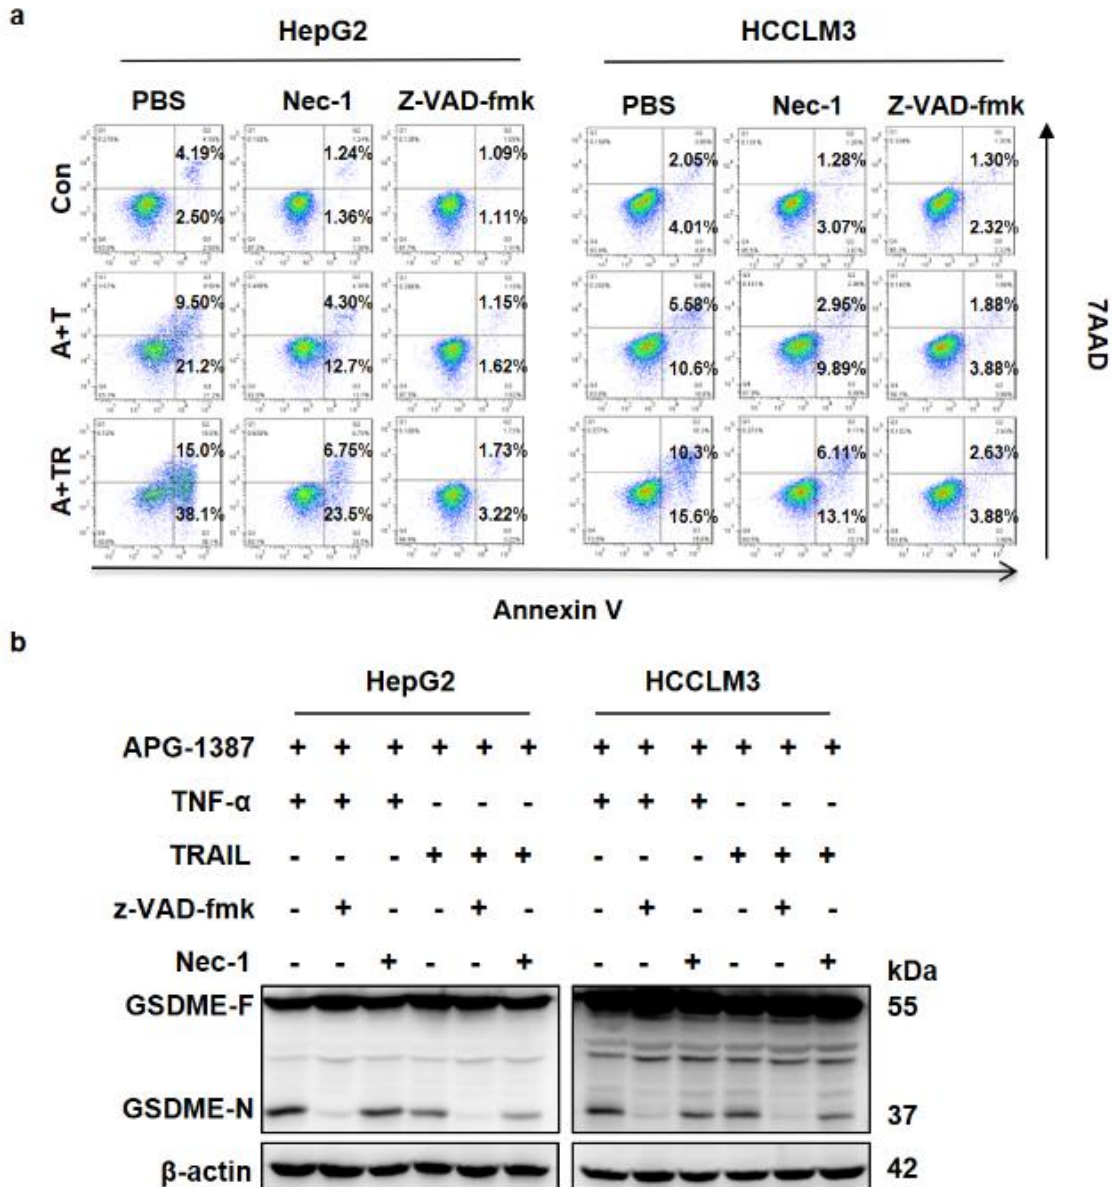

**Supplementary Figure 8.** APG-1387 treatment enhanced TNF- $\alpha$ - and TRAIL-induced cell death in HepG2 and HCCLM3 cells. HepG2 and HCCLM3 cells were pre-treated with a pan-caspase inhibitor (20  $\mu$ M Z-VAD-fmk) or RIPK1 inhibitor (50  $\mu$ M Nec-1) for 1 hour. Then the combination treatments involving 2  $\mu$ M APG-1387 with 100 ng/ml TNF- $\alpha$  or 20 ng/ml TRAIL were used. Cell death were assessed by flow cytometry (**a**) and Western blot (**b**). Nec-1, necrostatin-1; GSDME-F, full-length GSDME; GSDME-N, N terminal fragment of GSDME.

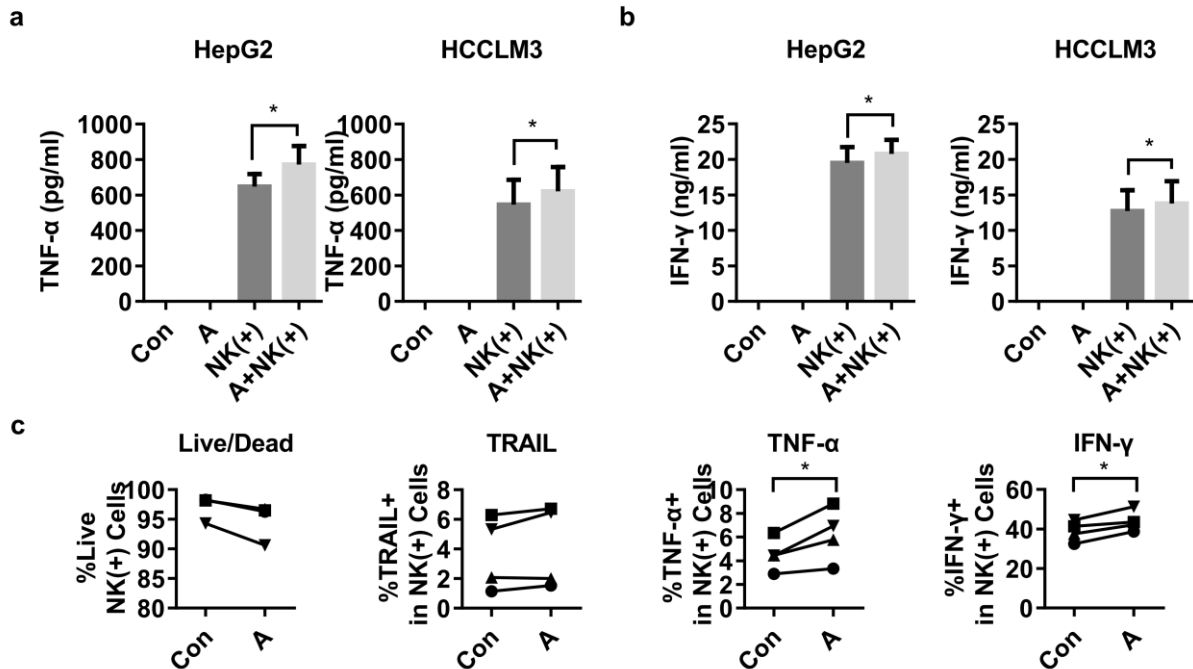

**Supplementary Figure 9.** Changes in cytotoxic potential of interleukin (IL)-12, IL-15, and IL-18 activated NK cells after APG-1387 stimulation. **(a, b)** HepG2 or HCCLM3 cells were co-cultured with purified NK cells, which stimulated with 10 ng/ml IL-12, 10 ng/ml IL-15 and 100 ng/ml IL-18, either alone or in the presence of 2  $\mu$ M APG-1387. After co-incubation for 24 hours, supernatants were collected for the examination of TNF- $\alpha$  and IFN- $\gamma$  by ELISA. **(c)** NK cells stimulated with 10 ng/ml IL-12, 10 ng/ml IL-15 and 100 ng/ml IL-18, were co-cultured with 2  $\mu$ M APG-1387 or not for 24 hours, then the percentage of living cells, TRAIL expression, TNF- $\alpha$  and IFN- $\gamma$  in NK cells were analyzed by flow cytometry. Con, control; A, 2  $\mu$ M APG-1387; NK(+), NK cells co-cultured with 10 ng/ml IL-12, 10 ng/ml IL-15 and 100 ng/ml IL-18; Live/Dead, a membrane and intracellular dye (ThermoFisher, cat. no. L34976) that can distinguish live cells from stained dead cells. Error bars represented the mean  $\pm$  S.E.M. of triplicate representative experiments; \*  $P < 0.05$ , by two-tailed paired t-test.

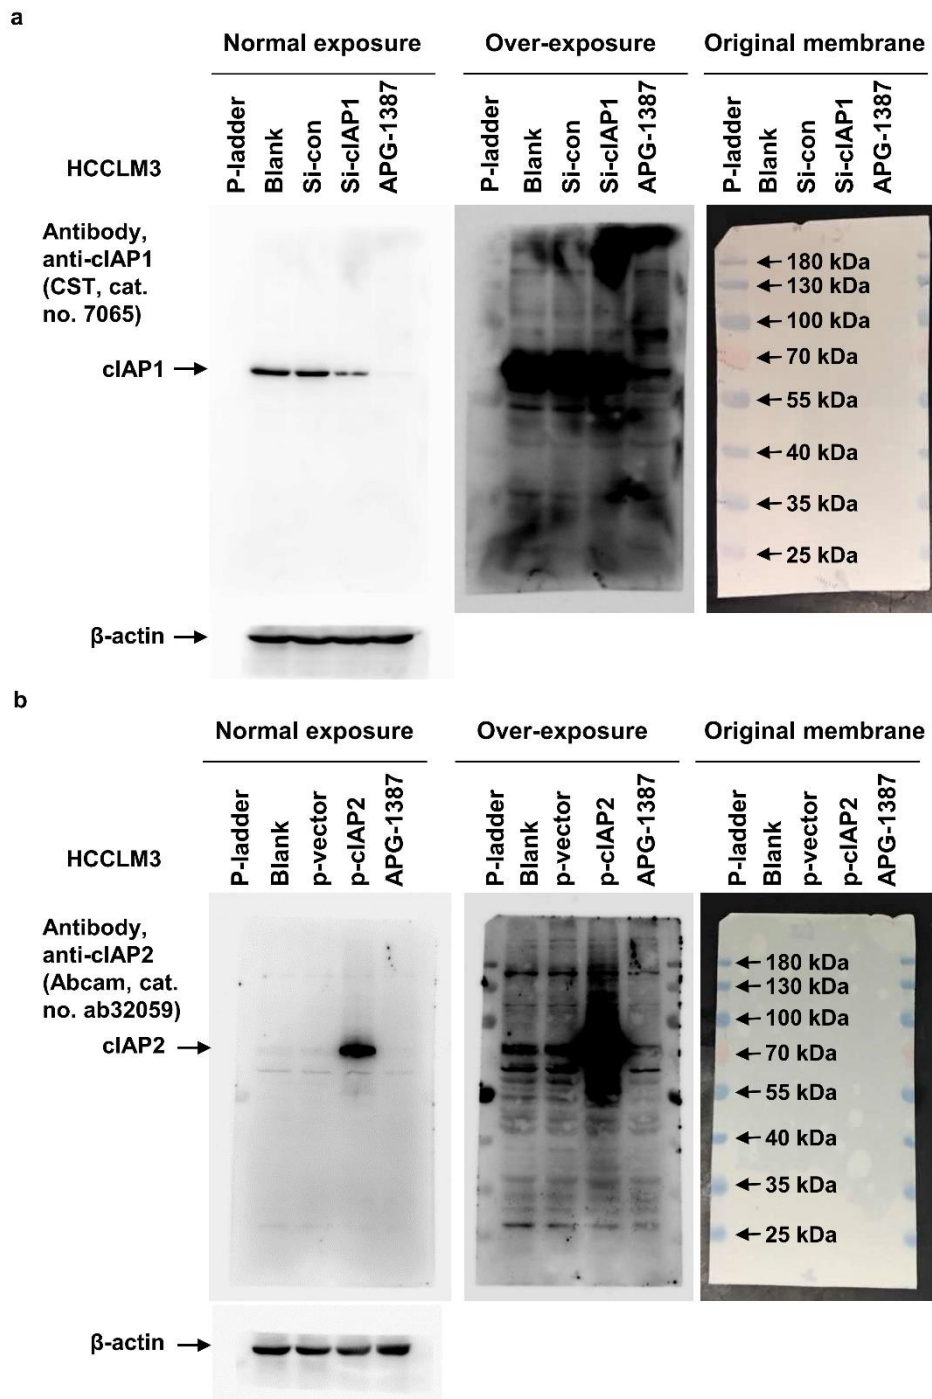

**Supplementary Figure 10.** Validation of cIAP1 and cIAP2 antibody. **(a)** For cIAP1 antibody, HCCLM3 cells were transfected with cIAP1 small interfering RNA (si-cIAP1), control small interfering RNA (si-con) or 2  $\mu$ M APG-1387; **(b)** for cIAP2 antibody, HCCLM3 cells were transfected with cIAP2 plasmid (p-cIAP2), negative control plasmid vector (p-vector) or 2  $\mu$ M APG-1387. After 48 hours treatment, cell lysates were collected. Western blot analysis was used to detect specificity of cIAP1 antibody (CST, cat. no. 7065) and cIAP2 antibody (Abcam, cat. no. ab32059). P-ladder, Pre-stained protein ladder (Life, cat. no. 26616); APG-1387, 2  $\mu$ M APG-1387.

## 2 Supplementary Tables

**Supplementary Table 1.** Clinical characteristics of 12 HCC patients from Tongji hospital

| Variable                                                      | Number/Mean $\pm$ SD (range) |
|---------------------------------------------------------------|------------------------------|
| Age (year)                                                    | 53.17 $\pm$ 3.657, (26-68)   |
| Gender (male or female)                                       | 10/2                         |
| HBV (+/-)                                                     | 12/0                         |
| HBsAg (>250/ $\leq$ 250 IU/mL)                                | 9/3                          |
| HBsAb (>10/ $\leq$ 10 IU/L)                                   | 2/10                         |
| HBeAg (>1/ $\leq$ 1 S/CO)                                     | 4/8                          |
| HBeAb (>1/ $\leq$ 1 S/CO)                                     | 5/7                          |
| HBcAb (>1/ $\leq$ 1 S/CO)                                     | 12/0                         |
| HCV (+/-)                                                     | 0/12                         |
| History of Schistosoma (+/-)                                  | 0/12                         |
| History of smoking (+/-)                                      | 4/8                          |
| History of drinking (+/-)                                     | 3/9                          |
| diabetes mellitus (+/-)                                       | 7/5                          |
| Hepatic encephalopathy (+/-)                                  | 1/11                         |
| Ascites (+/-)                                                 | 4/8                          |
| Pathological grading (poorly/moderately/well differentiation) | 4/4/4                        |
| Number of tumor nodules (>1/ $\leq$ 1)                        | 2/10                         |

**Supplementary Material**

---

|                                        |      |
|----------------------------------------|------|
| Tumor size (>3/≤3 cm)                  | 11/1 |
| Portal vein tumor thrombus (+/-)       | 4/8  |
| Distance metastasis (+/-)              | 1/11 |
| Tumor encapsulation (+/-)              | 6/6  |
| Cirrhosis (+/-)                        | 10/2 |
| Alanine aminotransferase (≥40/<40 U/L) | 3/9  |
| alpha-Fetoproteins (≥20/<20 μg/L)      | 8/4  |

---

SD, standard deviation;

HBV, hepatitis B virus; HBsAg, HBV surface antigen; HBsAb, antibody to HBsAg; HBeAg, HBV e Antigen; HBeAb, antibody to HBeAg; HBcAb, HBV core antibody; HCV, hepatitis C virus.

**Supplementary Table 2.** HCC patient characteristics data from TCGA public database

| <b>Characteristics</b>       | <b>HCC matched with adjacent normal liver tissue<br/>(n=49)</b> |
|------------------------------|-----------------------------------------------------------------|
| Age (year)                   | 61.4±16.2                                                       |
| (range)                      | (20-81)                                                         |
| Gender (male/female)         | 28/21                                                           |
| TNM                          |                                                                 |
| T1/T2/T3/T4                  | 20/13/13/3                                                      |
| N0/N1/Nx                     | 31/1/17                                                         |
| M0/M1/Mx                     | 32/1/16                                                         |
| Stage (I/II/III/IV/-)        | 18/10/12/1/8                                                    |
| Pathological grade (1/2/3/-) | 5/26/15/3                                                       |

HCC, hepatocellular carcinoma;

T, local tumor; N, lymph node; M, metastases.
